# Supplementary material for: Comparison of European ICU patients in 2012 (ICON) versus 2002 (SOAP)
Source: Springer Nature journal article supplement (doi:10.1007/s00134-017-5043-2), 2018-02-15
Supplement: MOESM1 [file 134_2017_5043_MOESM1_ESM.pdf]

## **SUPPLEMENTARY MATERIAL**

**Comparison of European ICU patients in 2012 (ICON) vs. 2002 (SOAP)**

**JL Vincent et al**

**e-Table 1.** Numbers of patients in participating countries in SOAP and ICON

| Country        | SOAP        |            |                   | ICON        |            |                   | Total       |            |
|----------------|-------------|------------|-------------------|-------------|------------|-------------------|-------------|------------|
|                | N. patients | N. centers | ICU mortality (%) | N. patients | N. centers | ICU mortality (%) | N. patients | N. centers |
| Belgium        | 703         | 19         | 12.2              | 487         | 27         | 14.2              | 1190        | 46         |
| UK             | 424         | 32         | 26.2              | 758         | 47         | 17.3              | 1182        | 79         |
| France         | 332         | 21         | 19.0              | 355         | 27         | 22.3              | 687         | 48         |
| Germany        | 329         | 21         | 11.9              | 757         | 39         | 12.4              | 1086        | 60         |
| Italy          | 237         | 24         | 25.7              | 301         | 33         | 21.0              | 538         | 57         |
| Spain          | 202         | 13         | 21.9              | 646         | 53         | 11.3              | 848         | 66         |
| Netherlands    | 144         | 7          | 22.9              | 222         | 13         | 14.5              | 366         | 20         |
| Switzerland    | 114         | 4          | 7.9               | 151         | 6          | 6.0               | 265         | 10         |
| Greece         | 109         | 10         | 16.5              | 45          | 12         | 36.4              | 154         | 22         |
| Portugal       | 69          | 6          | 34.8              | 193         | 23         | 24.1              | 262         | 29         |
| Austria        | 68          | 8          | 20.6              | 62          | 10         | 10.0              | 130         | 18         |
| Sweden         | 68          | 4          | 10.3              | 37          | 2          | 8.1               | 105         | 6          |
| Norway         | 61          | 5          | 21.3              | 29          | 2          | 24.1              | 90          | 7          |
| Finland        | 51          | 3          | 11.8              | 33          | 2          | 6.1               | 84          | 5          |
| Slovenia       | 46          | 2          | 17.4              | 79          | 7          | 14.1              | 125         | 9          |
| Czech Republic | 45          | 5          | 20.0              | 108         | 12         | 18.9              | 153         | 17         |
| Romania        | 44          | 2          | 25.0              | 189         | 10         | 39.2              | 233         | 12         |
| Ireland        | 33          | 2          | 33.3              | 75          | 7          | 17.6              | 108         | 9          |
| Denmark        | 29          | 4          | 10.3              | 49          | 3          | 10.2              | 78          | 7          |
| Poland         | 13          | 2          | 61.5              | 55          | 10         | 35.8              | 68          | 12         |
| Israel         | 13          | 1          | 15.4              | 23          | 2          | 30.4              | 36          | 3          |
| Hungary        | 8           | 1          | 25.0              | 55          | 5          | 32.1              | 63          | 6          |
| Slovakia       | 3           | 1          | 33.3              | 17          | 4          | 17.6              | 20          | 5          |
| Serbia         | 2           | 1          | 0.0               | 126         | 9          | 11.9              | 128         | 10         |
| <b>Total</b>   | <b>3147</b> | <b>198</b> | <b>18.5</b>       | <b>4852</b> | <b>365</b> | <b>16.8</b>       | <b>7999</b> | <b>563</b> |

**e-Table 2.** Types of microorganisms (%) in patients with positive microbiological cultures

|                       | SOAP<br>n=581 | ICON<br>n=1097 | p value |
|-----------------------|---------------|----------------|---------|
| Gram-positive         | 343 (59.0)    | 610 (55.6)     | 0.18    |
| Gram-negative         | 350 (60.2)    | 727 (66.3)     | 0.01    |
| Anaerobes             | 28 (4.8)      | 55 (5.0)       | 0.86    |
| Other bacteria        | 5 (0.9)       | 6 (0.5)        | 0.34    |
| Fungi                 | 157 (27.0)    | 162 (14.8)     | <0.001  |
| Viruses and parasites | 11 (1.9)      | 45 (4.1)       | 0.02    |

**e-Table 3.** Incidence and ICU mortality in the sepsis patients from the two cohorts according to the numbers and types of organ failures

| Sepsis                                                                        | Incidence, n (%) |               | ICU mortality, n (%) |             |
|-------------------------------------------------------------------------------|------------------|---------------|----------------------|-------------|
|                                                                               | SOAP (n= 930)    | ICON (n=1546) | SOAP                 | ICON        |
| Type of organ failure on admission, n (%)<br>(alone or in combination)        |                  |               |                      |             |
| Cardiovascular                                                                | 420 (45.2)       | 834 (53.9)‡   | 169 (40.2)           | 235 (28.4)‡ |
| Respiratory                                                                   | 330 (35.5)       | 638 (41.3)†   | 122 (37.0)           | 200 (31.5)  |
| CNS                                                                           | 287 (30.9)       | 517 (33.4)    | 103 (35.9)           | 165 (32.2)  |
| Renal                                                                         | 260 (28.0)       | 389 (25.2)    | 94 (36.2)            | 140 (36.1)  |
| Coagulation                                                                   | 86 (9.2)         | 106 (6.9)*    | 43 (50.0)            | 41 (39.4)   |
| Hepatic                                                                       | 52 (5.6)         | 215 (13.9)‡   | 22 (42.3)            | 46 (21.4)†  |
| No. of organ failures on admission, n (%)                                     |                  |               |                      |             |
| None                                                                          | 137 (14.7)       | 156 (10.1)‡   | 37 (27.2)            | 35 (22.6)   |
| 1 organ                                                                       | 348 (37.4)       | 562 (36.4)    | 84 (24.1)            | 88 (15.7)†  |
| 2 organs                                                                      | 291 (31.3)       | 456 (29.5)    | 94 (32.3)            | 111 (24.5)* |
| 3 organs                                                                      | 117 (12.6)       | 278 (18.0)‡   | 60 (51.3)            | 100 (36.2)† |
| 4+ organs                                                                     | 37 (4.0)         | 94 (6.1)*     | 24 (64.9)            | 52 (55.9)   |
| Type of organ failure during the ICU stay, n (%)<br>(alone or in combination) |                  |               |                      |             |
| Cardiovascular                                                                | 582 (62.6)       | 1105 (71.5)‡  | 246 (42.3)           | 336 (30.7)‡ |
| Respiratory                                                                   | 708 (76.1)       | 1015 (65.7)‡  | 244 (34.5)           | 325 (32.3)  |
| CNS                                                                           | 385 (41.4)       | 705 (45.6)*   | 169 (44.0)           | 257 (36.8)* |
| Renal                                                                         | 476 (51.2)       | 938 (60.7)‡   | 196 (41.2)           | 300 (32.1)‡ |
| Coagulation                                                                   | 187 (20.1)       | 284 (18.4)    | 99 (52.9)            | 124 (44.1)  |
| Hepatic                                                                       | 113 (12.2)       | 499 (32.3)‡   | 51 (45.5)            | 127 (25.5)‡ |
| No. of organ failures during the ICU stay, n(%)                               |                  |               |                      |             |
| 1 organ                                                                       | 235 (25.3)       | 238 (15.4)‡   | 17 (7.2)             | 8 (3.4)     |
| 2 organs                                                                      | 356 (38.3)       | 384 (24.8)‡   | 95 (26.7)            | 37 (9.7)‡   |
| 3 organs                                                                      | 219 (23.5)       | 403 (26.1)    | 100 (45.9)           | 109 (27.0)‡ |
| 4+ organs                                                                     | 120 (12.9)       | 521 (33.7)‡   | 87 (72.5)            | 232 (45.0)‡ |

Statistically significant vs SOAP: ‡ <0.001; † <0.01 and \* <0.05.

**e-Table 4.** Incidence and ICU mortality in the non-sepsis patients from the two cohorts according to the numbers and types of organ failures

| Non sepsis                                                                    | Incidence, n (%) |               | ICU mortality, n (%) |             |
|-------------------------------------------------------------------------------|------------------|---------------|----------------------|-------------|
|                                                                               | SOAP (n=2217)    | ICON (n=3306) | SOAP                 | ICON        |
| Type of organ failure on admission, n(%)<br>(alone or in combination)         |                  |               |                      |             |
| Cardiovascular                                                                | 356 (16.1)       | 723 (21.9)‡   | 109 (30.6)           | 193 (27.3)  |
| Respiratory                                                                   | 366 (16.5)       | 556 (16.8)    | 85 (23.2)            | 160 (29.4)* |
| CNS                                                                           | 396 (17.9)       | 577 (17.5)    | 152 (38.4)           | 230 (41.5)  |
| Renal                                                                         | 315 (14.2)       | 509 (15.4)    | 79 (25.1)            | 160 (32.1)* |
| Coagulation                                                                   | 63 (2.8)         | 90 (2.7)      | 17 (27.0)            | 28 (32.2)   |
| Hepatic                                                                       | 33 (1.5)         | 225 (6.8)‡    | 7 (21.2)             | 33 (15.4)   |
| No. of organ failures on admission, n(%)                                      |                  |               |                      |             |
| None                                                                          | 1201 (54.2)      | 1678 (50.8)*  | 47 (3.9)             | 70 (4.4)    |
| 1 organ                                                                       | 631 (28.5)       | 914 (27.6)    | 96 (15.2)            | 76 (8.5)‡   |
| 2 organs                                                                      | 273 (12.3)       | 459 (13.9)    | 81 (29.7)            | 121 (27.1)  |
| 3 organs                                                                      | 98 (4.4)         | 180 (5.4)     | 51 (52.0)            | 92 (52.6)   |
| 4+ organs                                                                     | 14 (0.6)         | 75 (2.3)‡     | 9 (64.3)             | 51 (70.8)   |
| Type of organ failure during the ICU stay, n (%)<br>(alone or in combination) |                  |               |                      |             |
| Cardiovascular                                                                | 470 (21.2)       | 873 (26.4)‡   | 157 (33.4)           | 235 (27.6)* |
| Respiratory                                                                   | 593 (26.7)       | 763 (23.1)†   | 149 (25.1)           | 223 (29.9)  |
| CNS                                                                           | 454 (20.5)       | 669 (20.2)    | 178 (39.2)           | 272 (42.2)  |
| Renal                                                                         | 644 (29.0)       | 1342 (40.6)‡  | 142 (22.0)           | 259 (19.6)  |
| Coagulation                                                                   | 122 (5.5)        | 167 (5.1)     | 42 (34.4)            | 54 (32.9)   |
| Hepatic                                                                       | 55 (2.5)         | 445 (13.5)‡   | 14 (25.5)            | 58 (13.5)*  |
| No of organ failures during the ICU stay, n (%)                               |                  |               |                      |             |
| None                                                                          | 903 (40.7)       | 1120 (33.9)‡  | 17 (1.9)             | 40 (3.8)*   |
| 1 organ                                                                       | 759 (34.2)       | 1019 (30.8)†  | 54 (7.1)             | 42 (4.2)†   |
| 2 organs                                                                      | 361 (16.3)       | 571 (17.3)    | 100 (27.7)           | 85 (15.3)‡  |
| 3 organs                                                                      | 149 (6.7)        | 341 (10.3)‡   | 78 (52.3)            | 115 (34.5)‡ |
| 4+ organs                                                                     | 45 (2.0)         | 255 (7.7)‡    | 35 (77.8)            | 128 (52.0)† |

Statistically significant vs SOAP: ‡ <0.001; † <0.01 and \* <0.05.

**e-Figure 1.** ICU mortality rates in ICON and SOAP studies according to number of failing organs in patients with sepsis (top panel) and without sepsis (bottom panel)

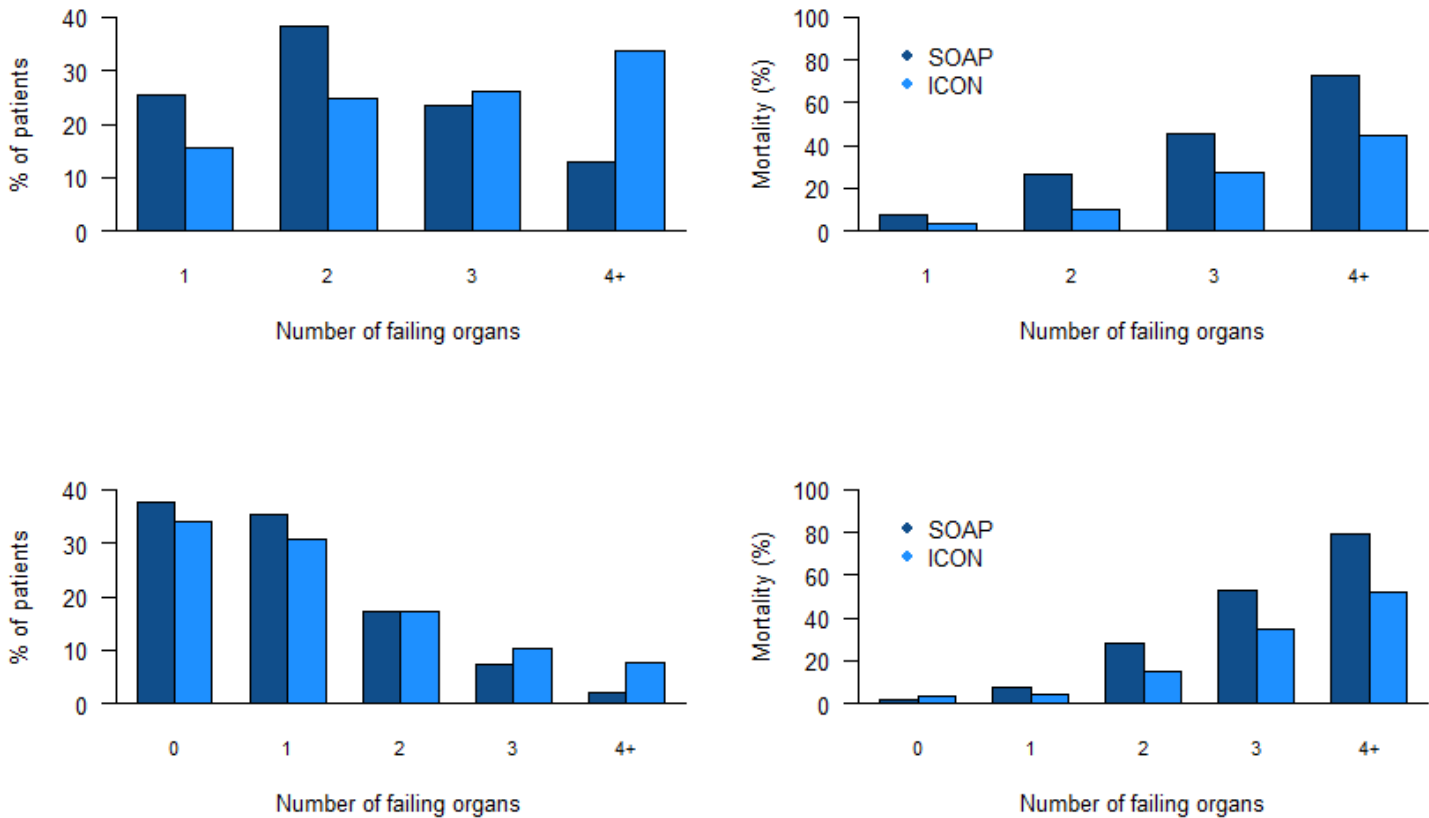

## e-Appendix

### Alphabetical list of SOAP participating centers by country

*Austria:* University Hospital of Vienna (G. Delle Karth); LKH Steyr (V. Draxler); LKH-Deutschlandsberg (G. Filzwieser); Otto Wagner Spital of Vienna (W. Heindl); Krems of Donau (G. Kellner, T. Bauer); Barmherzige Bruede of Linz (K. Lenz); KH Floridsdorf of Vienna (E. Rossmann); University Hospital of Innsbruck (C. Wiedermann)

*Belgium:* CHU of Charleroi (P. Biston); Hôpitaux Iris Sud of Brussels (D. Chochrad); Clinique Europe Site St Michel of Brussels (V. Collin); C.H.U. of Liège (P. Damas); University Hospital Ghent (J. Decruyenaere, E. Hoste); CHU Brugmann of Brussels (J. Devriendt); Centre Hospitalier Jolimont-Lobbes of Haine St Paul (B. Espeel); CHR Citadelle of Liege (V. Fraipont); UCL Mont-Godinne of Yvoir (E. Installe); ACZA Campus Stuivenberg (M. Malbrain); OLV Ziekenhuis Aalst (G. Nollet); RHMS Ath-Baudour-Tournai (J.C. Preiser); AZ St Augustinus of Wilrijk (J. Raemaekers); CHU Saint-Pierre of Brussels (A. Roman); Cliniques du Sud-Luxembourg of Arlon (M. Simon); Academic Hospital Vrije Universiteit Brussels (H. Spapen); AZ Sint-Blasius of Dendermonde (W. Swinnen); Clinique Notre-Dame of Tournai (F. Vallot); Erasme University Hospital of Brussels (J.L. Vincent)

*Czech Republic:* University Hospital of Plzen (I. Chytra); U SV.Anny of Brno (L. Dadak); Klaudians of Mlada Boleslav (I. Herold); General Faculty Hospital of Prague (F. Polak); City Hospital of Ostrava (M. Sterba); *Denmark* : Gentofte Hospital, University of Copenhagen (M. Bestle); Rigshospitalet of Copenhagen (K. Espersen); Amager Hospital of Copenhagen (H. Guldager); Rigshospitalet, University of Copenhagen (K-L. Welling)

*Finland:* Aland Central Hospital of Mariehamn (D. Nyman); Kuopio University Hospital (E. Ruokonen); Seinajoki Central Hospital (K. Saarinen)

*France:* Raymond Poincare of Garches (D. Annane); Institut Gustave Roussy of Villejuif (P. Catogni); Jacques Monod of Le Havre (G. Colas); CH Victor Jousselin of Dreux (F. Coulomb); Hôpital St Joseph & St Luc of Lyon (R. Dorne); Saint Joseph of Paris (M. Garrouste); Hôpital Pasteur of Nice (C. Isetta); CHU Brabois of Vandoeuvre Les Nancy (J. Larché); Saint Louis of Paris (J-R. LeGall); CHU de Grenoble (H. Lessire); CHU Pontchaillou of Rennes (Y. Malledant); Hôpital des Hauts Clos of Troyes (P. Mateu); CHU of Amiens (M. Ossart); Hôpital Lariboisière of Paris (D. Payen); CHD Félix Gyuon of Saint Denis La Reunion (P. Schlossmacher); Hôpital Bichat of Paris (J-F. Timsit); Hôpital Saint Andre of Bordeaux (S. Winnock); Hôpital Victor Dupouy of Argentueil (J-P. Sollet); CH Auch (L. Mallet); CHU Nancy-Brabois of Vandoeuvre (P. Maurer); CH William Morey of Chalon (JM. Sab); Victor Dupouy of Argentueil (JP. Sollet)

*Germany:* University Hospital Heidelberg (G. Aykut); Friedrich Schiller University Jena (F. Brunkhorst); University Clinic Hamburg-Eppendorf (A. Nierhaus); University Hospital Mainz (M. Lauterbach); University Hospital Carl Gustav Carus of Dresden (M. Ragaller); Hans Sushemihl Krankenhaus of Emden (R. Gatz); Vivantes-Klinikum Neukoelln of Berlin (H. Gerlach); University Hospital RWTH Aachen (D. Henzler); Kreisklinik Langen-Seligenstadt (H-B Hopf); GKH Bonn (H. Hueneburg); Zentralklinik Bad Berka (W. Karzai); Neuwerk of Moenchengladbach (A. Keller); Philipps University of Marburg (U. Kuhlmann); University Hospital Regensburg (J. Langgartner); ZKH Links der Weser of Bremen (C. Manhold); University Hospital of Dresden (M. Ragaller); Universtiy of Wuerzburg (B. Reith); Hannover Medical School (T. Schuerholz); Universitätsklinikum Charité Campus Mitte of Berlin (C. Spies); Bethanien Hospital of Moers (R. Stögbauer); KhgmbH Schongau (J. Unterburger)

*Greece:* Thriassio Hospital of Athens (P-M. Clouva-Molyvdas); Sismanoglion General Hospital of Athens (G. Giokas); KAT General Hospital of Athens (E. Ioannidou); G. Papanikolaou General Hospital of Thessaloniki (A. Lahana); Agios Demetrios of Thessaloniki (A. Liolios); Onassis Cardiac Surgery Center of Athens (K. Marathias); University Hospital of Ioannina (G. Nakos); Tzanio Hospital of Athens (A. Tasiou); Athens General Hospital Gennimatas (H. Tsangaris)

*Hungary:* Peterfy Hospital of Budapest (P. Tamasi)

*Ireland:* Mater Hospital of Dublin (B. Marsh); Beaumont Hospital of Dublin (M. Power)

*Israel:* Hadassah Hebrew University Medical Center (C. Sprung)

*Italy:* Azienda Ospedaliera Senese o Siena (B. Biagioli); S. Martino of Genova (F. Bobbio Pallavicini); Azienda Ospedaliera S. Gerardo dei Tintori of Monza (A. Pesenti); Osp Regionale of Saronno (C. Capra); Ospedale Maggiore - University A. Avogadro of Novara (F. Della Corte); Osp. Molinette of Torino (P. P. Donadio); A.O. Umberto I Ancona, Rianimazione Clinica (A. Donati); Azienda Ospedaliera Universitaria Policlinico of Palermo (A. Giarratano); San Giovanni Di Dio of Florence (T. Giorgio); H San Raffaele IRCCS of Milano (D. Giudici); Ospedale Di Busto Arsizio (S. Greco); Civile Di Massa (A. Guadagnucci); San Paolo of Milano (G. Lapichino); S.Giovanni Bosco Torino (S. Livigni); Osp. San Giovanni of Sesto (G. Moise); S Camillo of Roma (G. Nardi); Vittorio Emanuele of Catania (E. Panascia); Hospital of Piacenza (M. Pizzamiglio); Universita di Torino-Ospedale S. Giovanni Battista (V. M. Ranieri); Policlinico Le Scotte of Siena (R. Rosi); Ospedale Maggiore Policlinico IRCCS

of Milano (A. Sicignano); A. Uboldo of Cernusco Sul Naviglio (M. Solca); P.O. Civile Carrara of Massa (G. Vignali); San Giovanni of Roma (I. Volpe Rinonapoli)

*Netherlands*: Boven IJ Ziekenhuis of Amsterdam (M. Barnas); UMC St Radboud of Nijmegen (E.E. De Bel); Academic Medical Center of Amsterdam (A-C. De Pont); VUMC of Amsterdam (J. Groeneveld); Groningen University Hospital (M Nijsten); Waterlandziekenhuis of Purmerend (L Sie); OLVG of Amsterdam (D. F. Zandstra)

*Norway*: Sentralsjukehuset i Rogaland of Stavanger (S. Harboe); Sykehuset Østfold of Fredrikstad (S. Lindén); Aker University Hospital of Oslo (R. Z. Lovstad); Ulleval University Hospital of Oslo (H. Moen); Akershus University Hospital of Nordbyhagen (N. Smith-Erichsen)

*Poland*: Paediatric University Hospital of Lodz (A. Piotrowski); Central Clinic Hospital SLAM of Katowice (E. Karpel)

*Portugal* : Garcia de Orta of Almada (E. Almeida); Hospital de St. António dos Capuchos of Lisboa (R. Moreno); Hospital de Santa Maria of Lisboa (A. Pais-De-Lacerda); Hospital S.Joao of Porto (J. A. Paiva); Fernando Fonseca of Masama (I. Serra); São Teotonio Viseu (A. Pimentel)

*Romania*: Inst of Cardiovascular Diseases of Bucharest (D. Filipescu)

*Serbia*: Military Medical Academy of Belgrade (K. Jovanovic)

*Slovakia*: SUSCH of Bratislava (P. Malik)

*Slovenia*: General Hospital of Novo Mesto (K. Lucka); General Hospital of Celje (G. Voga)

*Spain*: Hospital Universitario Rio Hortega of Valladolid (C. Aldecoa Alvarez-Santullano); Sabadell Hospital (A. Artigas); Hospital Clinic of Barcelona (E. Zavala, A. Escorsell, J. Nicolas); Virgen del Camino of Pamplona (J. J. Izura Cea); Virgen de la Salud of Toledo (L. Marina); 12 de Octubre of Madrid (J. Montejo); Gregorio Marañon of Madrid (E. Palencia); General Universitario de Elche (F. Santos); Puerta del Mar of Cadiz (R. Sierra-Camerino); Fundación Jiménez Díaz of Madrid (F. Sipmann); Hospital Clinic of Barcelona (E. Zavala)

*Sweden*: Central Hospital of Kristianstad (K. Brodersen); Stockholm Soder Hospital (J. Haggqvist); Sunderby Hospital of Luleå (D. Hermansson); Huddinge University Hospital of Stockholm (H. Hjelmqvist)

*Switzerland*: Kantonsspital Luzern (K. Heer); Hirslanden Klinik Beau-Site of Bern (G. Loderer); University Hospital of Zurich (M. Maggiorini); Hôpital de la ville of La Chaux-de-Fonds (H. Zender)

*United Kingdom*: Edinburgh Western General Hospital (P. Andrews); Peterborough Hospitals NHS Trust of Peterborough (B. Appadu); University Hospital Lewisham, London (C. Barrera Groba); Bristol Royal Infirmary (J. Bewley); Queen Elizabeth Hospital Kings Lynn (K. Burchett); Milton Keynes General (P. Chambers); Homerton University Hospital of London (J. Coakley); Charing Cross Hospital of London (D. Doberenz); North Staffordshire Hospital of Stoke On Trent (N. Eastwood); Antrim Area Hospital (A. Ferguson); Royal Berkshire Hospital of Reading (J. Fielden); The James Cook University Hospital of Middlesbrough (J. Gedney); Addenbrookes of Cambridge (K. Gunning); Rotherham DGH (D. Harling); St.Helier of Carshalton (S. Jankowski); Southport & Formby (D. Jayson); Freeman of Newcastle Upon Tyne (A. Kilner); University Hospital of North Tees at Stockton on Tees (V. Krishna-Kumar); St. Thomas Hospital of London (K. Lei); Royal Infirmary of Edinburgh (S. Mackenzie); Derriford of Plymouth (P. Macnaughton); Royal Liverpool University Hospital (G. Marx); Stirling Royal Infirmary (C. McCulloch); University Hospital of Wales, Cardiff (P. Morgan); St George's Hospital of London (A. Rhodes); Gloucestershire Royal Hospital (C. Roberts); St Peters of Chertsey (M. Russell); James Paget Hospital of Great Yarmouth (D. Tupper-Carey, M. Wright); Kettering General Hospital (L. Twohey); Burnley DGH (J. Watts); Northampton General Hospital (R. Webster); Dumfries Royal Infirmary (D. Williams)

**Alphabetical list of ICON participating centers by region and country (for the same countries as were included in SOAP)**

***East Europe***

*Czech Republic*: Centre of Cardiovascular and Transplant Surgery (P Pavlik); Charles University Hospital (J Manak); IKEM, Prague (E Kieslichova); KNTB Zlín A.S. (R Turek); Krajska Nemocnice Liberec (M Fischer); Masarykova Nemocnice V Usti Nad Labem (R Valkova); St. Anne's University Hospital Brno (L Dadak); University Hospital Haradec Králové (P Dostal); University Hospital Brno (J Malaska); University Hospital Olomouc (R Hajek); University Hospital Plzen (A Židková); Charles University Hospital Plzen (P Lavicka)

*Hungary*: Dr. Kenessey Albert Hospital (L Medve); Fejér County St George Teaching Hospital (A Sarkany); Flor Ferenc County Hospital (I Kremer); Jávorszky Ödön Hospital (Z Marjanek); Peterfy Hospital Budapest (P Tamasi)

*Poland*: Csk Mswia (J Kolbusz); Medical University (A Kübler); Medical University Of Wroclaw (B Mielczarek); Medical University Warsaw (M Mikaszewska-Sokolewicz); Pomeranian Medical University (K Kotfis); Regional



Hospital in Poznan (B Tamowicz); Szpital Powiatowy W Ostrowi Mazowieckiej (W Sulkowski); University Hospital, Poznan (P Smuszkiewicz); Wojewódzki Szpital Zakazny (A Pihowicz); Wojewódzkie Centrum Medyczne (E Trejnowska)

*Romania:* Emergency County Hospital Cluj (N Hagau); Emergency Institute for Cardiovascular Diseases (D Filipescu); Fundeni Clinical Institute (G Droc); Galati Hospital (M Lupu); Inbi "Prof. Dr. Matei Bals" (A Nica); Institute of Pulmonology Marius Nasta (R Stoica); Institutul Clinic Fundeni (D Tomescu); Sfantul Pantelimon Hospital (D Constantinescu); Spitalul Cf 2 Bucuresti (G Valcoreanu Zbaganu); "Luliu Hatieganu" University of Medicine and Pharmacy, Teaching Hospital of Infectious Diseases, Cluj-Napoca (A Slavcovici)

*Serbia:* Clinic for Cardiac Surgery, Clinical Centre of Serbia (L Soskic); Clinic for Digestive Surgery, Clinical Centre Serbia (I Palibrk); Clinic for Vascular Surgery, Clinical Centre Nis (R Jankovic); Clinical Centre of Serbia (B Jovanovic); Clinical Centre of Serbia (M Pandurovic); Emergency Centre, Clinical Centre of Belgrade (V Bumbasirevic); General University Hospital (B Uljarevic); Military Medical Academy (M Surbatovic); Urology Hospital (N Ladjevic)

*Slovakia:* District Hospital (G Slobodianiuk); Faculty Hospital (V Sobona); University Hospital Bratislava-Hospital Ruzinov ICU (A Cikova); University Hospital Ruzinov Bratislava (A Gebhardtova)

### **Middle East**

*Israel:* Rabin Medical Centre (J Cohen); Sourasky Tel Aviv Medical Centre (O Sold)

### **West Europe**

*Austria:* Akh Wien (P Urbanek); Allgemeines Und Orthopädisches Landeskrankenhaus Stolzalpe (J Schlieber); Barmherzige Schwestern Linz (J Reisinger); General Hospital Braunau (J Auer); Krankenhaus D. Barmherzigen Schwestern Ried I.I. (A Hartjes); Krankenhaus Floridsdorf (A Lerche); LK Gmünd-Waidhofen/Thaya-Zwettl, Standort Zwettl (T Janous); LKH Hörgas-Enzenbach (E Kink); LKH West (W Krahulec); University Hospital (K Smolle)

*Belgium:* AZ Groeninge Kortrijk (M Van Der Schueren); AZ Jan Palfijn Gent (P Thibo); AZ Turnhout (M Vanhoof); Bracops Anderlecht (I Ahmet); Centre Hospitalier Mouscron (G Philippe); CH Peltzer La Tourelle (P Dufaye); Chirec Edith Cavell (O Jacobs); CHR Citadelle (V Fraipont); CHU Charleroi (P Biston); Chu Mont-Godinne (A Dive); CHU Tivoli (Y Bouckaert); Chwapi (E Gilbert); Clinique Saint-Pierre Ottignies (B Gressens); Clinique-Maternité Sainte Elisabeth (E Pinck); Cliniques De L'Europe - St-Michel (V Collin); Erasme University Hospital (JL Vincent); Ghent University Hospital (J De Waele); Moliere Hospital (R Rimachi); Notre Dame (D Gusu); Onze Lieve Vrouw Ziekenhuis, Aalst (K De Decker); Ixelles Hospital (K Mandianga); Sint-Augustinus (L Heytens); St Luc University Hospital (UCL) (X Wittebole); UZ Brussel (S Herbert); Vivalia Site De Libramont (V Olivier); VZW Gezondheidszorg Oostkust Knokke-Heist (W Vandenheede); ZNA Middelheim (P Rogiers)

*Denmark:* Herning Hospital (P Kolodzeike); Hjoerring Hospital (M Kruse); Vejle Hospital (T Andersen)

*Finland:* Helsinki University Central Hospital (V Harjola); Seinäjoki Central Hospital (K Saarinen)

*France:* Aix Marseille Univ, Hôpital Nord (M Leone); Calmette Hospital, Lille (A Durocher); Centre Hospitalier de Dunkerque (S Moulront); Centre Hospitalier Lyon Sud (A Lepape); Centre Hospitalo-Universitaire Nancy-Brabois (M Lossier); CH Saint Philibert, Ghicl, Lille (P Cabaret); CHR De Dax (E Kalaitzis); CHU Amiens (E Zogheib); CHU Dijon (P Charve); CHU Dupuytren (B Francois); CHU Nîmes (JY Lefrant); Centre Hospitalier De Troyes (B Beilouny); Groupe Hospitalier Est Francilien-Centre Hospitalier De Meaux (X Forceville); Groupe Hospitalier Paris Saint Joseph (B Misset); Hopital Antoine Béclère (F Jacobs); Hopital Edouard Herriot (F Bernard); Hôpital Lariboisière, APHP, Paris France (D Payen); Hopital Maison Blanche, Reims (A Wynckel); Hopitaux Universitaires de Strasbourg (V Castelain); Hospices Civils de Lyon (A Faure); CHU-Grenoble (P Lavagne); CHU-Nantes (L Thierry); Réanimation Chirurgical Cardiovasculaire, CHRU Lille (M Moussa); University Hospital Ambroise Paré (A Vieillard-Baron); University Hospital Grenoble (M Durand); University Hospital of Marseille (M Gannier); University of Nice (C Ichai)

*Germany:* Alexianer Krefeld Gmbh (S Arens); Charite Hochschulmedizin Berlin (C Hoffmann); Charite-University-Hospital, Berlin (M Kaffarnik); Diakoniekrankenhaus Henriettenstiftung Gmbh (C Scharnofske); Elisabeth-Krankenhaus Essen (I Voigt); Harlaching Hospital, Munich Municipal Hospital Group (C Peckelsen); Helios St.

Johannes Klinik (M Weber); Hospital St. Georg Leipzig (J Gille); Klinik Hennigsdorf Der Oberhavel Kliniken Gmbh (A Lange); Klinik Tettnang (G Schoser); Klinikum "St. Georg" Leipzig (A Sablotzki); Klinikum Augsburg (U Jaschinski); Klinikum Augsburg (A Bluethgen); Klinikum Bremen-Mitte (F Vogel); Klinikum Bremen-Ost (A Tscheu); Klinikum Heidenheim (T Fuchs); Klinikum Links Der Weser Gmbh (M Wattenberg); Klinikum Luedenscheid (T Helmes); Krankenhaus Neuwerk (S Scieszka); Marienkrankenhaus Schwerte (M Heintz); Medical Centre Cologne Merheim (S Sakka); Schwarzwald-Baar Klinikum Villingen-Schwenningen (J Kohler); St. Elisabeth Krankenhaus Köln-Hohenlind (F Fiedler); St. Martinus Hospital Olpe (M Danz); Uniklinikum Jena (Y Sakr); Universitätsklinikum Tübingen (R Riessen); Universitätsmedizin Mainz (T Kerz); University Hospital Aachen, CPACC (A Kersten); University Hospital Aachen, DMIII (F Tacke); University Hospital Aachen, OIC (G Marx); University Hospital Muenster (T Volkert); University Medical Centre Freiburg (A Schmutz); University Medical Centre Hamburg-Eppendorf (A Nierhaus); University Medical Centre Hamburg-Eppendorf (S Kluge); University Medicine Greifswald (P Abel); University of Duisburg-Essen (R Janosi); University of Freiburg (S Utzolino); University clinic Ulm (H Bracht); Vivantes Klinikum Neukoelln (S Toussaint)

*Greece:* Ahepa University Hospital (M Giannakou Peftoulidou); Athens University (P Myrianthefs); Athens University Medical School (A Armaganidis); Evangelismos Hospital (C Routsis); General Hospital of Chania, Crete (A Xini); Hippokration General Hospital, Thessaloniki (E Mouloudi); General hospital of Velos (I Kokoris); Lamia General Hospital (G Kyriazopoulos); Naval and Veterans Hospital (S Vlachos); Papanikolaou General Hospital (A Lavrentieva); University Hospital Alexandroupolis (P Partala); University of Ioannina (G Nakos)

*Ireland:* Cork University Hospital (J Barry); Mercy University Hospital (R O'Leary); Mid Western Regional Hospital Complex (C Motherway); Midland Regional Hospital Mullingar, Co Westmeath (M Faheem); St. Vincent's University Hospital (E Dunne); Tallaght Hospital (M Donnelly); University Hospital Galway (T Konrad)

*Italy:* Anesthesiology and Intensive Care (E Bonora); AO Ospedale Niguarda Ca' Granda (C Achilli); Azienda Ospedaliera Di Padova (S Rossi); Azienda Ospedaliero Universitaria Policlinico Vittorio Emanuele (G Castiglione); Careggi Teaching Hospital (A Peris); Clinicized Hospital Ss Annunziata - Chieti (D Albanese); Fondazione Irccs Ca' Granda Ospedale Maggiore Policlinico, Milano; University of Milan (N Stocchetti); H San Gerardo - Monza (G Citerio); Icu "Ceccarini" Hospital Riccione (L Mozzoni); Irccs Centro Cardiologico Monzino (E Sisillo); Irccs Centro Di Riferimento Oncologico Della Basilicata (P De Negri); Irccs Fondazione Ca' Granda - Ospedale Maggiore Policlinico (M Savioli); Ospedale Belcolle Viterbo (P Vecchiarelli); Ospedale Civile Maggiore - A.O.U.I Verona (F Puflea); Ospedale Civile Maggiore - A.O.U.I Verona (V Stankovic); Ospedale Di Circolo E Fondazione Macchi - Varese (G Minoja); Ospedale Di Trento - Azienda Provinciale Per I Servizi Sanitari Della Provincia Autonoma Di Trento (S Montibeller); Ospedale Orlandi (P Calligaro); Ospedale Regionale U.Parini-Aosta (R Sorrentino); Ospedale San Donato Arezzo (M Feri); Ospedale San Raffaele (M Zambon); Policlinico G.B. Rossi - A.O.U.I Verona (E Colombaroli); Policlinico University of Palermo (A Giarratano); Santa Maria Degli Angeli Hospital (T Pellis); Saronno Hospital (C Capra); Università Cattolica Del Sacro Cuore (M Antonelli); University Catania, Italy (A Gullo); University of Florence, Florence (C Chelazzi); University of Foggia (A De Capraris); University of Milano-Bicocca, San Gerardo Hospital (N Patroniti); University of Modena (M Girardis); University of Siena (F Franchi); University of Trieste (G Berlot)

*Netherlands:* Albert Schweitzer Hospital (H Ponssen); Antoni Van Leeuwenhoek Ziekenhuis (J Ten Cate); Atrium Medisch Centrum Parkstad (L Bormans); Bovenij Hospital (S Husada); Catharina Hospital Eindhoven (M Buise); Erasmus University Medical Centre (B Van Der Hoven); Martiniziekenhuis Groningen (A Reidinga); Medical Centre Leeuwarden (M Kuiper); Radboud University Nijmegen Medical Centre (P Pickkers); Slotervaart Ziekenhuis Amsterdam (G Kluge); Spaarne Ziekenhuis (S Den Boer); University Medical Centre Utrecht (J Kesecioglu); Ziekenhuis Rijnstate (H Van Leeuwen)

*Norway:* Haukeland University Hospital (H Flaatten); St Olavs Hospital, Trondheim University Hospital (S Mo)

*Portugal:* Centro Hospitalar Cova Da Beira (V Branco); Centro Hospitalar Do Porto (F Rua); Centro Hospitalar Do Tâmega E Sousa (E Lafuente); Centro Hospitalar Gaia/Espinho, Epe (M Sousa); Centro Hospitalar Médio Tejo (N Catorze); Centro Hospitalar Tondela-Viseu (M Barros); Faro Hospital (L Pereira); Hospital Curry Cabral (A Vintém De Oliveira); Hospital Da Luz (J Gomes); Hospital De Egas Moniz - Chlo (I Gaspar); Hospital De Santo António, Centro Hospitalar Do Porto (M Pereira); Hospital Divino Espírito Santo, Epe (M Cymbron); Hospital Espirito Santo - Évora Epe (A Dias); Hospital Garcia Orta (E Almeida); Hospital Geral Centro Hospitalar E Universitario

Coimbra (S Beirao); Hospital Prof. Doutor Fernando Fonseca Epe (I Serra); Hospital São Bernardo (R Ribeiro); Hospital Sao Francisco Xavier, Chlo (P Povia); Instituto Portugues De Oncologia Francisco Gentil, Porto (F Faria); Santa Maria Hospital (Z Costa-E-Silva); Serviço De Saúde Da Região Autónoma Da Madeira (J Nóbrega); UCIP (F Fernandes); ULS - Castelo Branco (J Gabriel)

*Slovenia:* General Hospital Celje (G Voga); General Hospital Izola (E Rupnik); General Hospital Novo Mesto (L Kosec); Oncological Institute (M Kerin Povšic); Ukc Maribor (I Osojnik); University Clinic of Respiratory and Allergic Diseases (V Tomic); University Clinical Centre Maribor (A Sinkovic)

*Spain:* CH Salamanca (J González); Clinic Hospital (E Zavala); Complejo Hospitalario De Jaén (J Pérez Valenzuela); Complejo Hospitalario De Toledo (L Marina); Complejo Hospitalario Universitario De Ourense (P Vidal-Cortés); Complejo Hospitalario Universitario De Vigo (P Posada); Corporación Sanitaria Parc Tauli (A Ignacio Martin-Loeches); Cruz Roja Hospital (N Muñoz Guillén); H Vall Hebron (M Palomar); HGGC Dr Negrín (J Sole-Violan); Hospital Clinic (A Torres); Hospital Clinico San Carlos (M Gonzalez Gallego); Hospital Clínico Universitario De Valencia (G Aguilar); Hospital Clínico Universitario Lozano Blesa (R Montoiro Allué); Hospital Clinico Valencia (M Argüeso); Hospital De La Ribera (M Parejo); Hospital De Sagunto (M Palomo Navarro); Hospital De San Juan De Alicante (A Jose); Hospital De Torrejon De Ardoz (N Nin); Hospital Del Mar (F Alvarez Lerma); Hospital Del Tajo (O Martinez); Hospital General Universitario De Elche (E Tenza Lozano); Hospital General Universitario Gregorio Marañon (S Arenal López); Hospital General Universitario Gregorio Marañon (M Perez Granda); Hospital General Universitario Santa Lucía (S Moreno); Hospital Germans Trias I Pujol (C Llubia); Hospital Infanta Margarita (C De La Fuente Martos); Hospital Infanta Sofia (P Gonzalez-Arenas); Hospital J.M. Morales Meseguer (N Llamas Fernández); Hospital J.M. Morales Meseguer (B Gil Rueda ); Hospital Marina Salu. Denia. Alicante. (I Estruch Pons); Hospital Nuestra Señora Del Prado, Talavera De La Reina, Toledo. España (N Cruza); Hospital San Juan De Dios Aljarafe (F Maroto); Hospital Sas of Jerez (A Estella); Hospital Son Llatzer (A Ferrer); Hospital Universitario Central De Asturias (L Iglesias Fraile); Hospital Universitario Central De Asturias (B Quindos); Hospital Universitario De Alava, Santiago (A Quintano); Hospital Universitario De Basurto, Bilbao (M Tebar); Hospital Universitario de Getafe (P Cardinal); Hospital Universitario De La Princesa (A Reyes); Hospital Universitario de Tarragona Joan Xxiii (A Rodríguez); Hospital Universitario Del Henares (A Abella); Hospital Universitario Fundación Alcorcón (S García Del Valle); Hospital Universitario La Paz (S Yus); Hospital Universitario La Paz (E Maseda); Hospital Universitario Rio Hortega (J Berezo); Hospital Universitario San Cecilio (Granada) (A Tejero Pedregosa); Hospital Virgen Del Camino (C Laplaza); Mutua Terrassa University Hospital (R Ferrer); Rão Hortega University Hospital (J Rico-Feijoo); Servicio Andaluz De Salud. Spain. (M Rodríguez); University Opf Navarra (P Monedero)

*Sweden:* Karolinska University Hospital And Karolinska Institute (K Eriksson); Sunderby Hospital, Luleå (D Lind)

*Switzerland:* Hôpital Intercantonal De La Broye (D Chabanel); Hôpital Neuchâtelois - La Chaux-De-Fonds (H Zender); Lindenhofspital (K Heer); Regionalspital Surselva Ilanz (Gr) Schweiz (B Frankenberger); University Hospital Bern (S Jakob); Zentrum Für Intensivmedizin (A Haller)

*United Kingdom:* Alexandra Hospital Redditch (S Mathew); Blackpool Teaching Hospitals (R Downes); Brighton And Sussex University Hospitals (C Barrera Groba); Cambridge University Hospitals NHS Foundation Trust (A Johnston); Charing Cross Hospital (R Meacher); Chelsea & Westminster Hospital (R Keays); Christie Foundation Trust (P Haji-Michael); County Hospital, Lincoln (C Tyler); Craigavon Area Hospital (A Ferguson); Cumberland Infirmary (S Jones); Darent Valley Hospital (D Tyl); Dorset County Hospital (A Ball); Ealing Hospital NHS Trust (J Vogel); Glasgow Royal Infirmary (M Booth); Gloucester Royal Hospital (P Downie); The Great Western Hospital, Swindon (M Watters); Imperial College Healthcare NHS Trust (S Brett); Ipswich Hospital Nhs Trust (M Garfield); James Paget University Hospital NHS Foundation Trust (L Everett); King's College Hospital (S Heenen); King's Mill Hospital (S Dhir); Leeds Teaching Hospitals NHS Trust (Z Beardow); Lewisham Healthcare NHS Trust (M Mostert); Luton and Dunstable Hospital NHS Trust (S Brosnan); Medway Maritime Hospital (N Pinto); Musgrove Park Hospital (S Harris); Nevill Hall Hospital (A Summors); Pilgrim Hospital (N Andrew); Pinderfields Hospital, Mid Yorkshire NHS Trust (A Rose); Plymouth Hospitals Nhs Trust (R Appelboom); Princess Royal Hospital Telford (O Davies); Royal Bournemouth Hospital (E Vickers); Royal Free Hampstead NHS Foundation Trust (B Agarwal); Royal Glamorgan Hospital (T Szakmany); Royal Hampshire County Hospital (S Wimbush); Royal Liverpool University Hospital (I Welters); Royal London Hospital, Barts Health NHS Trust (R Pearse); Royal Shrewsbury

Hospital (R Hollands); Royal Surrey County Hospital (J Kirk-Bayley); St Georges Healthcare (N Fletcher); Surrey & Sussex Healthcare Trust (B Bray); University College Hospital (D Brealey)
